# Supplementary material for: Top-Down Inhibition of BMP Signaling Enables Robust Induction of hPSCs Into Neural Crest in Fully Defined, Xeno-free Conditions
Source: PubMed Central journal article supplement (PMC5639211; doi:10.1016/j.stemcr.2017.08.008), 2017-09-14
Supplement: mmc1.pdf [file mmc1.pdf]

**Stem Cell Reports, Volume 9**

**Supplemental Information**

**Top-Down Inhibition of BMP Signaling Enables Robust Induction of  
hPSCs Into Neural Crest in Fully Defined, Xeno-free Conditions**

**James O.S. Hackland, Tom J.R. Frith, Oliver Thompson, Ana Marin Navarro, Martin I.  
Garcia-Castro, Christian Unger, and Peter W. Andrews**

## Supplemental Data

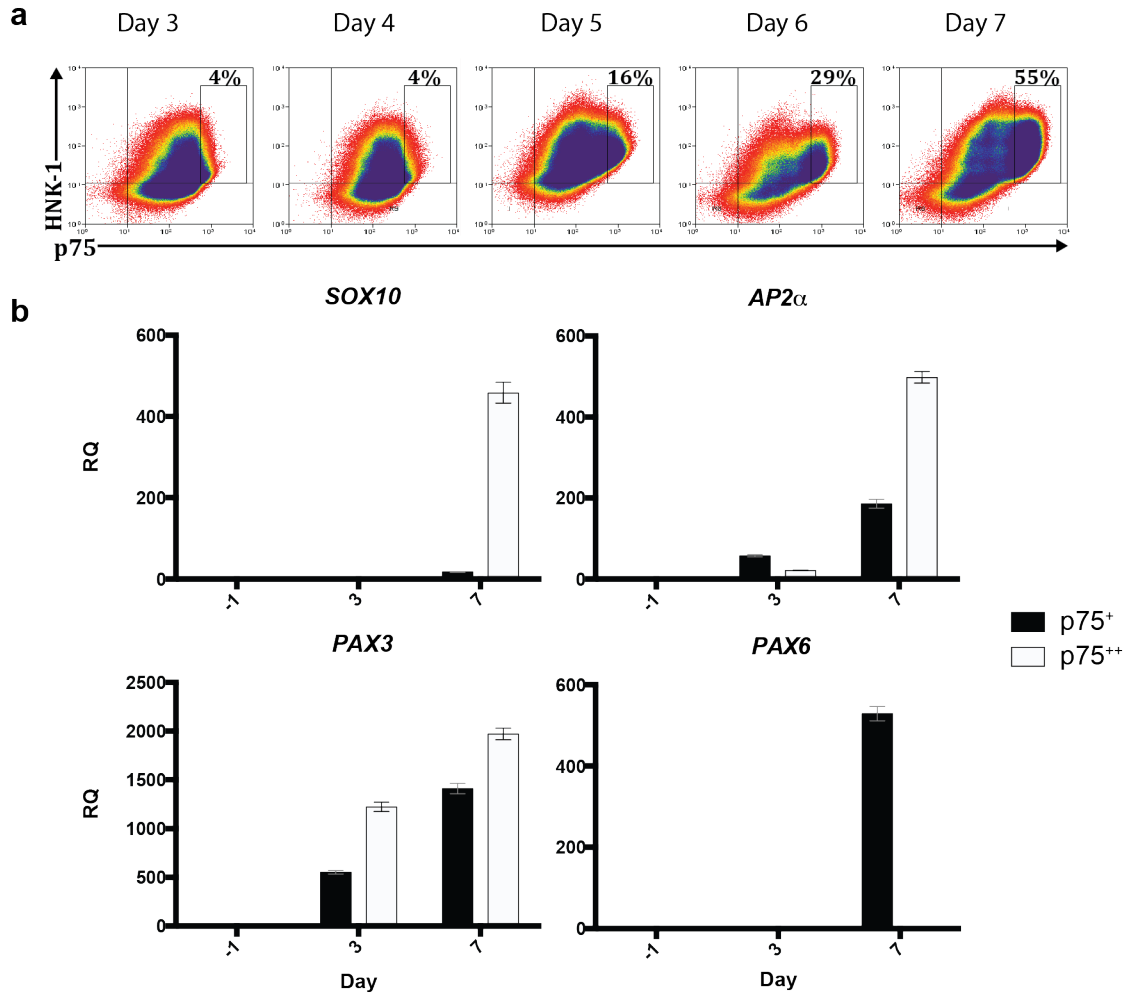

**Figure S1. Gene expression in p75 high/low (p75<sup>++</sup>/p75<sup>+</sup>) during neural crest induction of *Shof6* using *NCN2*.** Related to Figure 1. (a) The surface marker p75 is upregulated during neural crest induction and (b) can be used to purify the culture for *SOX10* expressing cells in the absence of a *SOX10* reporter construct. Data represents a single experiment showing typical distribution of gene expression between populations.

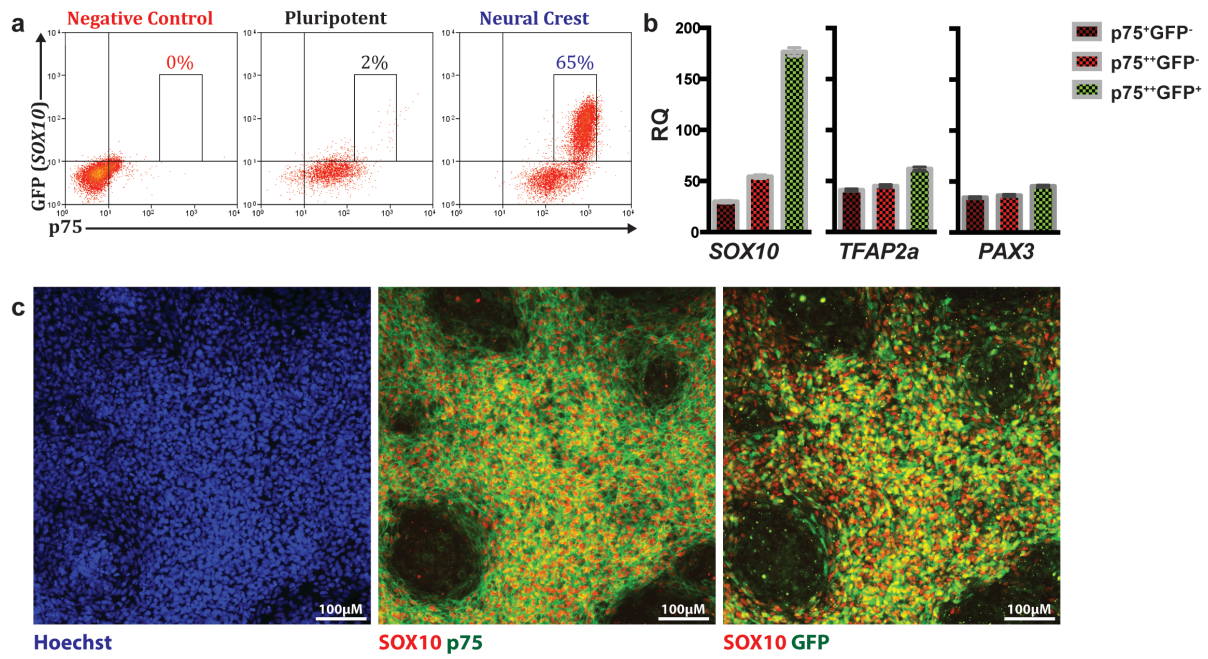

**Figure S2. Expression of surface markers and neural crest-associated genes in H9:SOX10.** Related to Figures 2, 3 & 4. (a) Expression of GFP and p75 in pluripotent cells and after 7 days of neural crest differentiation. (b) Expression of neural crest-associated genes after FACS in p75<sup>+</sup>, p75<sup>++</sup> and p75<sup>+++</sup>GFP<sup>+</sup> populations after neural crest differentiation. Data represents a single experiment showing technical replicates. (c) Expression of SOX10, p75 and GFP in a typical culture at day 7 of neural crest differentiation.

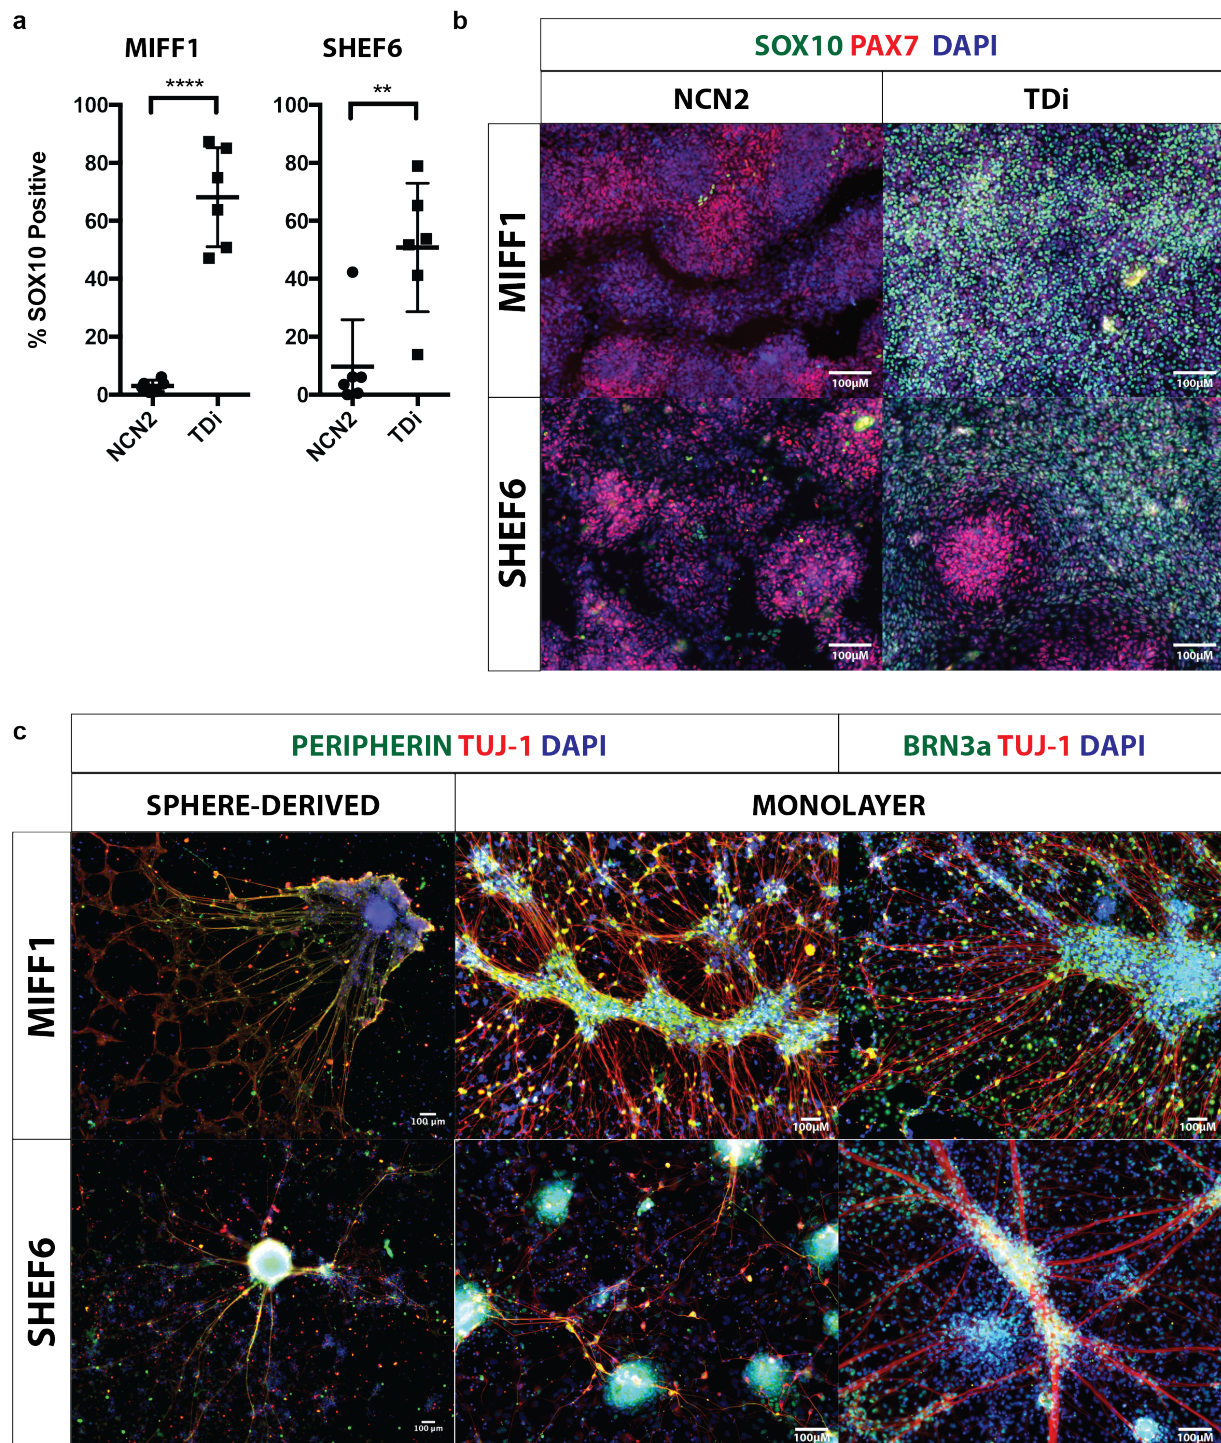

**Figure S3. Neural crest induction using TDi in Shef6 (hESC) and Miff-1 (hiPSC).** Related to Figure 4. **(a)** Use of TDi during neural crest induction significantly improves the reproducibility of differentiation in both Shef6 and Miff-1. Each point represents a single experiment. Error bars represent SD. \* $P \leq 0.05$ , \*\* $P \leq 0.01$ , \*\*\* $P \leq 0.001$ , \*\*\*\* $P \leq 0.0001$ . Efficiency of induction was calculated by applying Nikon Elements image analysis software to immunofluorescence data examples of which are shown in **(b)**. **(b)** Typical expression of neural crest markers SOX10 and PAX7 after 7 days of induction using either NCN2 or TDi. **(c)** Neural crest generated from Shef6 and Miff-1 respond to neural induction conditions, either in monolayer or from sphere culture, by expressing the peripheral neural marker Peripherin and the sensory neural marker Brn3a.



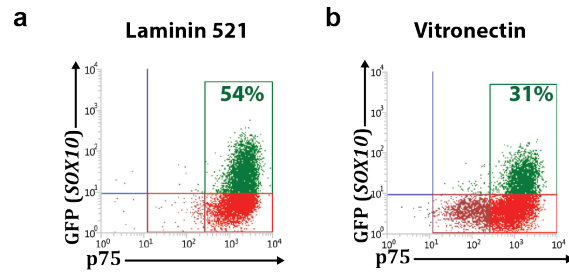

**Figure S4. Neural Crest differentiation on other matrices.** Related to differentiation in fully defined and xeno-free conditions. Neural crest differentiation of H9:SOX10 on fully defined and xeno-free matrices Laminin-521 and vitronectin using TDi.

| Antibody      | Supplier/Catalog Number |
|---------------|-------------------------|
| Ms anti PAX3  | DSHB/AB528426           |
| Ms anti PAX6  | Santa Cruz/sc81649      |
| Rb anti SOX10 | Cell signaling/89356S   |
| Rb anti SOX2  | Cell signaling/3579P    |
| Rb anti p75   | Cell signaling/8238     |
| Ms anti HNK-1 | Sigma/C6680             |
| Chk anti GFP  | Abcam/ab13970           |
| Ms anti S100b | Sigma/S2532             |

List of antibodies used for FACS and immunofluorescence.

| Gene                 | Assay ID      |
|----------------------|---------------|
| <i>SOX10</i>         | Hs00366918_m1 |
| <i>TFAP2a</i>        | Hs01029413_m1 |
| <i>PAX3</i>          | Hs00240950_m1 |
| <i>PAX6</i>          | Hs01088114_m1 |
| <i>SOX2</i>          | Hs01053049_s1 |
| <i>GATA2</i>         | Hs00231119_m1 |
| <i>GATA3</i>         | Hs00231122_m1 |
| <i>OCT4 (POU5F1)</i> | Hs04260367_gH |

List of Taqman Gene Expression Assay mixes used (Catalog Number 4331182).

## **Supplemental Experimental Procedures**

### **Pluripotent Stem Cell Culture**

WA09 (H9) (Thomson et al. 1998), Shef6 (Aflatoonian et al. 2010), and H9:*SOX10* (Chambers et al. 2012) hESC, and Miff-1 (Desmarais et al. 2016), NB1 (unpublished, fully characterized) hiPSC, were cultured in mTESR on matrigel. All cells used had a normal diploid karyotype.

### **Neural Crest Differentiation**

N2 supplement was sourced from ThermoFisher (17502048), CHIR99021, SB431542 and DMH1 were sourced from Tocris (4425, 1614, 4126 respectively) and BMP4 was from Life Technologies (PHC9534).

### **Immunofluorescence**

Cultures were fixed in 4% paraformaldehyde for 10 minutes before permeabilization and blocking for 1 hour (1% BSA, 10% goat serum, 0.3M glycine and 0.1% Tween-20 in PBS). Primary and secondary antibody incubation was carried out in the same buffer overnight and for 1 hour respectively (see supplemental table). Hoechst 33342 (H3570 - Life Technologies) was used as a DNA stain. Images were taken using an InCell Analyser 2200 (GE Healthcare Life Sciences). For the data presented in Supplemental Figure 3 images were taken using a Nikon Eclipse Ti and analyzed using Nikon Elements image analysis software. These data were calculated as follows: Each biological replicate shown represents the mean expression values of three technical replicates each of which represent four preset locations within each well. The positive/negative intensity threshold was set in each case with the aid of an additional well without primary antibody.

### **Flow Cytometry**

Flow cytometry analysis was carried out as previously described (Draper et al. 2002). Briefly, cultures were treated with Accutase (Gibco - A11105-01) and both primary and secondary antibody incubation was carried out in FACS buffer (10% FCS, PBS) for 15 minutes (see supplemental table). Cells were analyzed using a BD FACSJazz (BD Biosciences). For negative controls the antibody produced by the parent myeloma P3X63AG8 was used (Kohler & Milstein 1975; Draper et al. 2002).

### **qPCR**

RNA was extracted from whole cultures or sorted populations using TRIzol (15596018 - Life Technologies) and cDNA was generated using Multiscribe reverse transcriptase (4311235 - Life Technologies). qPCR was carried out using 4ng

of cDNA per 10ml reaction with Taqman Fast Universal PCR master mix (1411408 - Life Technologies) and pre-optimized Gene Expression Assay mixes (4331182 - Life Technologies; supplementary table) before analysis using the QuantStudio 12K Flex Real-Time PCR system (4471087 - Life Technologies). Data are presented either as difference in cycle threshold between the gene of interest (GOI) and  $\beta$ -Actin ( $\Delta\text{cT}$ ) or a relative quantification (RQ) of the change in gene expression between the initial pluripotent culture and the differentiated culture (RQ;  $2^{-\Delta\Delta\text{cT}}$ ).

### **Terminal Differentiation of Neural Crest**

Terminal differentiation was performed on GFP<sup>+</sup> sorted putative neural crest derived from H9:*SOX10* unless otherwise stated. For mesectoderm differentiation, cells were plated out in MesenCult™-ACF (StemCell Technologies Cat# 05449). After 10 days, medium was changed to MesenCult™-ACF Chondrogenic Differentiation Medium (StemCell Technologies Cat#05455) or Osteogenic Stimulatory Kit (StemCell Technologies Cat# 05404) and analyzed using Toluidine Blue (Acris Bioscience) Alizarin Red staining (Sigma A5533 ).

Terminal differentiation into neural lineages was carried out as described in Lee (2010) either as a monolayer or as neural crest spheres directly from non-adherent culture. Plates were coated with Fibronectin (Sigma F1141), Laminin (Cultrex 3400-010-01) and Poly-L-Ornithine (Sigma P4957). FGF, EGF, GDNF, BDNF and NGF were sourced from peprotech and dbCAMP from Sigma (D0627). The BRN3a and ISL1 expression shown in Figure 2d and Supplemental Figure 3 was achieved using the modified version of this protocol described in (Chambers et al. 2012).
